# Supplementary material for: Identification of genes specifically or preferentially expressed in maize silk reveals similarity and diversity in transcript abundance of different dry stigmas
Source: PubMed Central journal article supplement (PMC3416702; doi:10.1186/1471-2164-13-294), 2012-07-02
Supplement: 1471-2164-13-294-S6.pdf [file 1471-2164-13-294-S6.pdf]

# agriGO Analysis Toolkit and Database for Agricultural Community

HOME ANALYSIS TOOL SEARCH DOWNLOADS MANUAL FAQ Job ID:

Select terms to [ Draw graphical results ] [ Create bar chart ] [ Suppress term number ]  
 [ Use NO-adjusted Pvalue ]

| GO Information |            |                                                      | CM |   |   |   | MS      |         |         | MP      |         |         | MO      |         |         | SL      |         |         |
|----------------|------------|------------------------------------------------------|----|---|---|---|---------|---------|---------|---------|---------|---------|---------|---------|---------|---------|---------|---------|
| No             | GO Term    | Onto Number Description                              | 1  | 2 | 3 | 4 | Z-score | Mean    | FDRnbp; | Z-score | Mean    | FDRnbp; | Z-score | Mean    | FDRnbp; | Z-score | Mean    | FDRnbp; |
| 1              | GO:0006032 | P 16 chitin catabolic process                        | █  |   |   |   | 15      | 4.6e+02 | 0       | -0.44   | 0.58    | 0.93    | -1      | 12      | 0.54    | -0.56   | 15      | 0.81    |
| 2              | GO:0006030 | P 16 chitin metabolic process                        | █  |   |   |   | 15      | 4.6e+02 | 0       | -0.44   | 0.58    | 0.93    | -1      | 12      | 0.54    | -0.56   | 15      | 0.81    |
| 3              | GO:0006026 | P 16 aminoglycan catabolic process                   | █  |   |   |   | 15      | 4.6e+02 | 0       | -0.44   | 0.58    | 0.93    | -1      | 12      | 0.54    | -0.56   | 15      | 0.81    |
| 4              | GO:0006022 | P 18 aminoglycan metabolic process                   | █  |   |   |   | 14      | 4.1e+02 | 0       | -0.47   | 0.52    | 0.93    | -1.1    | 12      | 0.48    | -0.61   | 15      | 0.8     |
| 5              | GO:0000272 | P 28 polysaccharide catabolic process                | █  |   |   |   | 11      | 2.6e+02 | 0       | 2.3     | 1.4e+02 | 0.27    | -1.1    | 14      | 0.51    | -0.65   | 17      | 0.79    |
| 6              | GO:0010876 | P 49 lipid localization                              | █  |   |   |   | 7.9     | 1.5e+02 | 3e-13   | 0.3     | 40      | 0.93    | 0.054   | 23      | 0.99    | 0.79    | 33      | 0.75    |
| 7              | GO:0006869 | P 49 lipid transport                                 | █  |   |   |   | 7.9     | 1.5e+02 | 3e-13   | 0.3     | 40      | 0.93    | 0.054   | 23      | 0.99    | 0.79    | 33      | 0.75    |
| 8              | GO:0009057 | P 315 macromolecule catabolic process                | █  |   | █ |   | 5.9     | 63      | 3.5e-07 | -0.34   | 24      | 0.93    | 6.7     | 38      | 3.7e-10 | 6.5     | 50      | 7.9e-10 |
| 9              | GO:0016052 | P 159 carbohydrate catabolic process                 | █  |   | █ |   | 5.8     | 78      | 3.9e-07 | 0.58    | 41      | 0.93    | 3.8     | 35      | 0.00083 | 7.2     | 64      | 6.7e-12 |
| 10             | GO:0016998 | P 30 cell wall macromolecule catabolic process       | █  |   |   |   | 5.7     | 1.4e+02 | 6.4e-07 | -0.47   | 6.8     | 0.93    | -1.3    | 13      | 0.41    | -1.3    | 9.1     | 0.45    |
| 11             | GO:0009056 | P 423 catabolic process                              | █  |   | █ |   | 5.5     | 55      | 1.9e-06 | -0.75   | 20      | 0.93    | 5.3     | 33      | 1.1e-06 | 6.6     | 46      | 4.9e-10 |
| 12             | GO:0044036 | P 32 cell wall macromolecule metabolic process       | █  |   |   |   | 5.5     | 1.4e+02 | 2.2e-06 | -0.5    | 6.4     | 0.93    | -1.4    | 13      | 0.36    | -1.3    | 9.4     | 0.44    |
| 13             | GO:0009074 | P 10 aromatic amino acid family catabolic process    | █  |   |   |   | 4.2     | 1.8e+02 | 0.0011  | -0.35   | 0.14    | 0.93    | -0.17   | 21      | 0.94    | 1.6     | 60      | 0.28    |
| 14             | GO:0006559 | P 10 L-phenylalanine catabolic process               | █  |   |   |   | 4.2     | 1.8e+02 | 0.0011  | -0.35   | 0.14    | 0.93    | -0.17   | 21      | 0.94    | 1.6     | 60      | 0.28    |
| 15             | GO:0005976 | P 164 polysaccharide metabolic process               | █  |   |   |   | 4.2     | 62      | 0.0011  | 0.56    | 41      | 0.93    | 2.7     | 31      | 0.027   | 0.94    | 30      | 0.65    |
| 16             | GO:0006633 | P 77 fatty acid biosynthetic process                 | █  |   |   |   | 3.8     | 75      | 0.0049  | -0.54   | 13      | 0.93    | -0.21   | 22      | 0.93    | 0.76    | 31      | 0.75    |
| 17             | GO:0009308 | P 389 amine metabolic process                        | █  |   |   |   | 3.8     | 47      | 0.0049  | -0.44   | 23      | 0.93    | 3.6     | 30      | 0.0016  | 5       | 42      | 3e-06   |
| 18             | GO:0006631 | P 95 fatty acid metabolic process                    | █  |   |   |   | 3.8     | 70      | 0.0049  | -0.67   | 11      | 0.93    | -0.052  | 23      | 0.99    | 0.81    | 31      | 0.73    |
| 19             | GO:0033036 | P 427 macromolecule localization                     | █  |   |   |   | 3.8     | 45      | 0.0057  | -0.68   | 21      | 0.93    | 4.1     | 31      | 0.00021 | 1.4     | 30      | 0.36    |
| 20             | GO:0006414 | P 44 translational elongation                        | █  |   |   |   | 3.8     | 89      | 0.0059  | -0.38   | 14      | 0.93    | 13      | 1e+02   | 0       | 14      | 1.7e+02 | 0       |
| 21             | GO:0032787 | P 121 monocarboxylic acid metabolic process          | █  |   |   |   | 3.5     | 61      | 0.014   | -0.79   | 11      | 0.93    | -0.099  | 22      | 0.97    | 1.4     | 34      | 0.38    |
| 22             | GO:0051258 | P 38 protein polymerization                          | █  |   |   |   | 3.5     | 89      | 0.015   | 3.9     | 1.9e+02 | 0.0038  | 13      | 1.1e+02 | 0       | 6.1     | 92      | 8.4e-09 |
| 23             | GO:0006558 | P 16 L-phenylalanine metabolic process               | █  |   |   |   | 3.2     | 1.2e+02 | 0.044   | -0.45   | 0.3     | 0.93    | -0.47   | 18      | 0.81    | 0.99    | 42      | 0.62    |
| 24             | GO:0004568 | F 16 chitinase activity                              | █  |   |   |   | 15      | 4.6e+02 | 0       | -0.44   | 0.58    | 0.93    | -1      | 12      | 0.64    | -0.56   | 15      | 0.8     |
| 25             | GO:0008289 | F 88 lipid binding                                   | █  |   |   |   | 6.2     | 1e+02   | 1.3e-07 | 0.53    | 44      | 0.93    | 0.63    | 26      | 0.81    | 0.71    | 30      | 0.77    |
| 26             | GO:0005199 | F 82 structural constituent of cell wall             | █  |   |   |   | 5.9     | 1e+02   | 5e-07   | 1.1     | 60      | 0.93    | 4.8     | 45      | 3.2e-05 | 0.44    | 28      | 0.84    |
| 27             | GO:0042923 | F 16 neuropeptide binding                            | █  |   |   |   | 4.8     | 1.6e+02 | 0.00016 | -0.44   | 0.92    | 0.93    | 1.2     | 35      | 0.54    | 0.32    | 30      | 0.88    |
| 28             | GO:0008188 | F 16 neuropeptide receptor activity                  | █  |   |   |   | 4.8     | 1.6e+02 | 0.00016 | -0.44   | 0.92    | 0.93    | 1.2     | 35      | 0.54    | 0.32    | 30      | 0.88    |
| 29             | GO:0042165 | F 19 neurotransmitter binding                        | █  |   |   |   | 4.5     | 1.4e+02 | 0.00059 | -0.47   | 1.1     | 0.93    | 1.3     | 35      | 0.54    | 0.3     | 30      | 0.89    |
| 30             | GO:0030594 | F 19 neurotransmitter receptor activity              | █  |   |   |   | 4.5     | 1.4e+02 | 0.00059 | -0.47   | 1.1     | 0.93    | 1.3     | 35      | 0.54    | 0.3     | 30      | 0.89    |
| 31             | GO:0005198 | F 741 structural molecule activity                   | █  |   |   |   | 4.3     | 43      | 0.00095 | -0.29   | 27      | 0.93    | 15      | 46      | 0       | 19      | 73      | 0       |
| 32             | GO:0016841 | F 11 ammonia-lyase activity                          | █  |   |   |   | 3.9     | 1.6e+02 | 0.0059  | -0.37   | 0.46    | 0.93    | 0.073   | 24      | 0.99    | 1.6     | 58      | 0.41    |
| 33             | GO:0003746 | F 30 translation elongation factor activity          | █  |   |   |   | 3.5     | 97      | 0.026   | -0.3    | 15      | 0.93    | 13      | 1.2e+02 | 0       | 12      | 1.7e+02 | 0       |
| 34             | GO:0005737 | C 1440 cytoplasm                                     | █  |   |   |   | 4.1     | 37      | 0.0062  | -1.8    | 17      | 0.59    | 17      | 41      | 0       | 20      | 60      | 0       |
| 35             | GO:0005576 | C 230 extracellular region                           | █  |   |   |   | 3.6     | 52      | 0.028   | 13      | 2.5e+02 | 0       | -0.7    | 21      | 0.6     | -1.4    | 18      | 0.37    |
| 36             | GO:0019953 | P 49 sexual reproduction                             | █  |   |   |   | -0.22   | 21      | 1       | 16      | 6.3e+02 | 0       | -1.5    | 14      | 0.3     | -1.4    | 12      | 0.39    |
| 37             | GO:0071555 | P 65 cell wall organization                          | █  |   |   |   | -0.98   | 11      | 1       | 13      | 4.4e+02 | 0       | 0.18    | 24      | 0.94    | -1.1    | 16      | 0.55    |
| 38             | GO:0000003 | P 76 reproduction                                    | █  |   |   |   | -0.42   | 19      | 1       | 13      | 4e+02   | 0       | -2.2    | 12      | 0.088   | -1.9    | 10      | 0.18    |
| 39             | GO:0030036 | P 42 actin cytoskeleton organization                 | █  |   |   |   | -0.53   | 15      | 1       | 12      | 5.2e+02 | 0       | -0.62   | 19      | 0.76    | -1.1    | 14      | 0.59    |
| 40             | GO:0030029 | P 42 actin filament-based process                    | █  |   |   |   | -0.53   | 15      | 1       | 12      | 5.2e+02 | 0       | -0.62   | 19      | 0.76    | -1.1    | 14      | 0.59    |
| 41             | GO:0042545 | P 30 cell wall modification                          | █  |   |   |   | -1      | 2.6     | 1       | 11      | 5.5e+02 | 0       | -1.2    | 14      | 0.46    | -1.6    | 5.2     | 0.3     |
| 42             | GO:0007010 | P 64 cytoskeleton organization                       | █  |   |   |   | -0.64   | 15      | 1       | 10      | 3.6e+02 | 0       | -0.56   | 20      | 0.79    | -1.3    | 14      | 0.46    |
| 43             | GO:0071554 | P 102 cell wall organization or biogenesis           | █  |   |   |   | 2.2     | 50      | 0.3     | 9.9     | 2.8e+02 | 0       | -0.85   | 19      | 0.63    | -1.8    | 13      | 0.22    |
| 44             | GO:0071669 | P 30 plant-type cell wall organization or biogenesis | █  |   |   |   | -0.77   | 8.4     | 1       | 8       | 4.1e+02 | 9.1e-14 | -0.47   | 19      | 0.81    | -1.5    | 6.7     | 0.34    |
| 45             | GO:0009664 | P 30 plant-type cell wall organization               | █  |   |   |   | -0.77   | 8.4     | 1       | 8       | 4.1e+02 | 9.1e-14 | -0.47   | 19      | 0.81    | -1.5    | 6.7     | 0.34    |
| 46             | GO:0009415 | P 17 response to water                               | █  |   |   |   | 1.5     | 67      | 0.82    | 6       | 4.1e+02 | 1.1e-07 | 2.3     | 46      | 0.066   | 0.5     | 33      | 0.82    |
| 47             | GO:0006996 | P 278 organelle organization                         | █  |   |   |   | 0.42    | 27      | 1       | 4.6     | 1e+02   | 0.00024 | 14      | 57      | 0       | 5.2     | 46      | 1.5e-06 |
| 48             | GO:0016043 | P 488 cellular component organization                | █  |   |   |   | 1.5     | 32      | 0.82    | 4.1     | 78      | 0.0019  | 15      | 52      | 0       | 6.3     | 44      | 2.7e-09 |
| 49             | GO:0009075 | P 12 histidine family amino acid metabolic process   | █  |   |   |   | -0.32   | 14      | 1       | 4       | 3.3e+02 | 0.0034  | -0.17   | 21      | 0.94    | 0.019   | 25      | 1       |



|     |            |   |      |                                                                |  |  |  |  |  |       |    |       |       |         |       |     |         |         |     |         |         |
|-----|------------|---|------|----------------------------------------------------------------|--|--|--|--|--|-------|----|-------|-------|---------|-------|-----|---------|---------|-----|---------|---------|
| 110 | GO:0007018 | P | 98   | microtubule-based movement                                     |  |  |  |  |  | 1.2   | 39 | 1     | 2.1   | 84      | 0.36  | 8.5 | 58      | 0       | 3.1 | 46      | 0.0072  |
| 111 | GO:0010467 | P | 2144 | gene expression                                                |  |  |  |  |  | 0.22  | 25 | 1     | -3.3  | 11      | 0.026 | 8.5 | 30      | 0       | 8.2 | 37      | 3.5e-15 |
| 112 | GO:0009059 | P | 2183 | macromolecule biosynthetic process                             |  |  |  |  |  | 0.017 | 25 | 1     | -3.2  | 12      | 0.032 | 8.5 | 30      | 0       | 8.2 | 37      | 6.9e-15 |
| 113 | GO:0019538 | P | 2787 | protein metabolic process                                      |  |  |  |  |  | 1     | 27 | 1     | -1.6  | 21      | 0.79  | 8.4 | 29      | 0       | 8.8 | 36      | 0       |
| 114 | GO:0044260 | P | 4281 | cellular macromolecule metabolic process                       |  |  |  |  |  | -0.28 | 24 | 1     | -3    | 17      | 0.052 | 8.3 | 28      | 0       | 5.7 | 31      | 1e-07   |
| 115 | GO:0044238 | P | 6051 | primary metabolic process                                      |  |  |  |  |  | 1.8   | 27 | 0.58  | -2.1  | 22      | 0.35  | 8.2 | 27      | 4.6e-15 | 8.1 | 32      | 1e-14   |
| 116 | GO:0006457 | P | 235  | protein folding                                                |  |  |  |  |  | 2.4   | 43 | 0.19  | -0.49 | 21      | 0.93  | 8.2 | 45      | 8.9e-15 | 6.5 | 54      | 6.3e-10 |
| 117 | GO:0070271 | P | 189  | protein complex biogenesis                                     |  |  |  |  |  | 1.5   | 37 | 0.84  | 0.91  | 47      | 0.93  | 8   | 47      | 1.7e-14 | 3.2 | 41      | 0.0053  |
| 118 | GO:0006461 | P | 189  | protein complex assembly                                       |  |  |  |  |  | 1.5   | 37 | 0.84  | 0.91  | 47      | 0.93  | 8   | 47      | 1.7e-14 | 3.2 | 41      | 0.0053  |
| 119 | GO:0043170 | P | 4738 | macromolecule metabolic process                                |  |  |  |  |  | 0.92  | 26 | 1     | -3    | 18      | 0.047 | 7.7 | 27      | 2e-13   | 5.2 | 30      | 9.3e-07 |
| 120 | GO:0015986 | P | 64   | ATP synthesis coupled proton transport                         |  |  |  |  |  | 2.8   | 65 | 0.094 | -0.47 | 14      | 0.93  | 7.5 | 61      | 1.4e-12 | 10  | 1.1e+02 | 0       |
| 121 | GO:0015985 | P | 64   | energy coupled proton transport, down electrochemical gradient |  |  |  |  |  | 2.8   | 65 | 0.094 | -0.47 | 14      | 0.93  | 7.5 | 61      | 1.4e-12 | 10  | 1.1e+02 | 0       |
| 122 | GO:0006091 | P | 249  | generation of precursor metabolites and energy                 |  |  |  |  |  | 2.4   | 42 | 0.19  | -0.46 | 22      | 0.93  | 7.4 | 42      | 1.6e-12 | 15  | 87      | 0       |
| 123 | GO:0034220 | P | 66   | ion transmembrane transport                                    |  |  |  |  |  | 2.9   | 65 | 0.094 | -0.48 | 14      | 0.93  | 7.4 | 61      | 1.7e-12 | 10  | 1.1e+02 | 0       |
| 124 | GO:0006596 | P | 12   | polyamine biosynthetic process                                 |  |  |  |  |  | 1.6   | 78 | 0.72  | 1.7   | 1.6e+02 | 0.72  | 7.4 | 1.1e+02 | 1.8e-12 | 6.1 | 1.4e+02 | 7.2e-09 |
| 125 | GO:0006595 | P | 12   | polyamine metabolic process                                    |  |  |  |  |  | 1.6   | 78 | 0.72  | 1.7   | 1.6e+02 | 0.72  | 7.4 | 1.1e+02 | 1.8e-12 | 6.1 | 1.4e+02 | 7.2e-09 |
| 126 | GO:0015992 | P | 76   | proton transport                                               |  |  |  |  |  | 2.9   | 62 | 0.092 | -0.34 | 19      | 0.93  | 7.4 | 58      | 2.2e-12 | 10  | 1e+02   | 0       |
| 127 | GO:0006818 | P | 76   | hydrogen transport                                             |  |  |  |  |  | 2.9   | 62 | 0.092 | -0.34 | 19      | 0.93  | 7.4 | 58      | 2.2e-12 | 10  | 1e+02   | 0       |
| 128 | GO:0007017 | P | 128  | microtubule-based process                                      |  |  |  |  |  | 0.79  | 33 | 1     | 1.7   | 68      | 0.72  | 7   | 48      | 4.6e-11 | 2.4 | 39      | 0.062   |
| 129 | GO:0044281 | P | 1146 | small molecule metabolic process                               |  |  |  |  |  | 2.9   | 34 | 0.09  | -1.3  | 20      | 0.93  | 6.9 | 31      | 6.3e-11 | 11  | 48      | 0       |
| 130 | GO:0042401 | P | 15   | cellular biogenic amine biosynthetic process                   |  |  |  |  |  | 1.4   | 67 | 0.86  | 1.4   | 1.2e+02 | 0.93  | 6.9 | 96      | 6.8e-11 | 5.7 | 1.2e+02 | 1e-07   |
| 131 | GO:0006119 | P | 79   | oxidative phosphorylation                                      |  |  |  |  |  | 2.6   | 59 | 0.15  | -0.56 | 13      | 0.93  | 6.7 | 54      | 3e-10   | 9.5 | 97      | 0       |
| 132 | GO:0051246 | P | 85   | regulation of protein metabolic process                        |  |  |  |  |  | 3     | 61 | 0.086 | -0.47 | 16      | 0.93  | 6.7 | 53      | 3.1e-10 | 2.9 | 46      | 0.016   |
| 133 | GO:0060348 | P | 15   | bone development                                               |  |  |  |  |  | 0.6   | 42 | 1     | -0.4  | 2.4     | 0.93  | 6.6 | 93      | 4.7e-10 | 3.6 | 88      | 0.0015  |
| 134 | GO:0001503 | P | 15   | ossification                                                   |  |  |  |  |  | 0.6   | 42 | 1     | -0.4  | 2.4     | 0.93  | 6.6 | 93      | 4.7e-10 | 3.6 | 88      | 0.0015  |
| 135 | GO:0001501 | P | 15   | skeletal system development                                    |  |  |  |  |  | 0.6   | 42 | 1     | -0.4  | 2.4     | 0.93  | 6.6 | 93      | 4.7e-10 | 3.6 | 88      | 0.0015  |
| 136 | GO:0044262 | P | 440  | cellular carbohydrate metabolic process                        |  |  |  |  |  | 0.62  | 28 | 1     | -0.47 | 24      | 0.93  | 6.4 | 35      | 1.8e-09 | 8.7 | 53      | 0       |
| 137 | GO:0048731 | P | 19   | system development                                             |  |  |  |  |  | 0.5   | 38 | 1     | -0.46 | 1.9     | 0.93  | 6.2 | 82      | 5.3e-09 | 3.1 | 73      | 0.0087  |
| 138 | GO:0044265 | P | 254  | cellular macromolecule catabolic process                       |  |  |  |  |  | 2.4   | 42 | 0.19  | -0.92 | 14      | 0.93  | 6   | 38      | 2.3e-08 | 6.4 | 52      | 1.6e-09 |
| 139 | GO:0048856 | P | 20   | anatomical structure development                               |  |  |  |  |  | 0.45  | 36 | 1     | -0.47 | 1.8     | 0.93  | 6   | 78      | 2.3e-08 | 3   | 70      | 0.012   |
| 140 | GO:0006006 | P | 169  | glucose metabolic process                                      |  |  |  |  |  | 1.4   | 37 | 0.91  | -0.18 | 26      | 0.93  | 5.9 | 41      | 4.1e-08 | 11  | 83      | 0       |
| 141 | GO:0030163 | P | 141  | protein catabolic process                                      |  |  |  |  |  | 1.1   | 35 | 1     | -1    | 7.5     | 0.93  | 5.9 | 43      | 4.3e-08 | 1.5 | 33      | 0.33    |
| 142 | GO:0005996 | P | 213  | monosaccharide metabolic process                               |  |  |  |  |  | 1.2   | 34 | 1     | -0.45 | 21      | 0.93  | 5.6 | 39      | 2.5e-07 | 10  | 71      | 0       |
| 143 | GO:0031325 | P | 11   | positive regulation of cellular metabolic process              |  |  |  |  |  | 1.6   | 81 | 0.71  | -0.32 | 4.5     | 0.93  | 5.6 | 92      | 2.5e-07 | 2.9 | 84      | 0.014   |
| 144 | GO:0010604 | P | 11   | positive regulation of macromolecule metabolic process         |  |  |  |  |  | 1.6   | 81 | 0.71  | -0.32 | 4.5     | 0.93  | 5.6 | 92      | 2.5e-07 | 2.9 | 84      | 0.014   |
| 145 | GO:0009893 | P | 11   | positive regulation of metabolic process                       |  |  |  |  |  | 1.6   | 81 | 0.71  | -0.32 | 4.5     | 0.93  | 5.6 | 92      | 2.5e-07 | 2.9 | 84      | 0.014   |
| 146 | GO:0009141 | P | 141  | nucleoside triphosphate metabolic process                      |  |  |  |  |  | 1.9   | 43 | 0.47  | -0.59 | 16      | 0.93  | 5.5 | 42      | 4.1e-07 | 7   | 65      | 3.4e-11 |
| 147 | GO:0009206 | P | 140  | purine ribonucleoside triphosphate biosynthetic process        |  |  |  |  |  | 1.9   | 43 | 0.47  | -0.59 | 16      | 0.93  | 5.5 | 42      | 4.5e-07 | 7   | 65      | 2.8e-11 |
| 148 | GO:0009205 | P | 140  | purine ribonucleoside triphosphate metabolic process           |  |  |  |  |  | 1.9   | 43 | 0.47  | -0.59 | 16      | 0.93  | 5.5 | 42      | 4.5e-07 | 7   | 65      | 2.8e-11 |
| 149 | GO:0009201 | P | 140  | ribonucleoside triphosphate biosynthetic process               |  |  |  |  |  | 1.9   | 43 | 0.47  | -0.59 | 16      | 0.93  | 5.5 | 42      | 4.5e-07 | 7   | 65      | 2.8e-11 |
| 150 | GO:0009199 | P | 140  | ribonucleoside triphosphate metabolic process                  |  |  |  |  |  | 1.9   | 43 | 0.47  | -0.59 | 16      | 0.93  | 5.5 | 42      | 4.5e-07 | 7   | 65      | 2.8e-11 |
| 151 | GO:0009145 | P | 140  | purine nucleoside triphosphate biosynthetic process            |  |  |  |  |  | 1.9   | 43 | 0.47  | -0.59 | 16      | 0.93  | 5.5 | 42      | 4.5e-07 | 7   | 65      | 2.8e-11 |
| 152 | GO:0009144 | P | 140  | purine nucleoside triphosphate metabolic process               |  |  |  |  |  | 1.9   | 43 | 0.47  | -0.59 | 16      | 0.93  | 5.5 | 42      | 4.5e-07 | 7   | 65      | 2.8e-11 |
| 153 | GO:0009142 | P | 140  | nucleoside triphosphate biosynthetic process                   |  |  |  |  |  | 1.9   | 43 | 0.47  | -0.59 | 16      | 0.93  | 5.5 | 42      | 4.5e-07 | 7   | 65      | 2.8e-11 |
| 154 | GO:0019318 | P | 190  | hexose metabolic process                                       |  |  |  |  |  | 1.3   | 36 | 0.94  | -0.3  | 24      | 0.93  | 5.4 | 39      | 5.3e-07 | 10  | 76      | 0       |
| 155 | GO:0046034 | P | 133  | ATP metabolic process                                          |  |  |  |  |  | 1.8   | 43 | 0.52  | -0.58 | 16      | 0.93  | 5.4 | 42      | 7.9e-07 | 6.7 | 64      | 1.7e-10 |
| 156 | GO:0006754 | P | 133  | ATP biosynthetic process                                       |  |  |  |  |  | 1.8   | 43 | 0.52  | -0.58 | 16      | 0.93  | 5.4 | 42      | 7.9e-07 | 6.7 | 64      | 1.7e-10 |
| 157 | GO:0008152 | P | 7584 | metabolic process                                              |  |  |  |  |  | 1.8   | 27 | 0.53  | -1.9  | 24      | 0.48  | 5.3 | 25      | 9.1e-07 | 11  | 33      | 0       |
| 158 | GO:0018193 | P | 12   | peptidyl-amino acid modification                               |  |  |  |  |  | 1.4   | 72 | 0.86  | -0.35 | 3.4     | 0.93  | 5.3 | 85      | 1.3e-06 | 3.3 | 90      | 0.0037  |
| 159 | GO:0009309 | P | 143  | amine biosynthetic process                                     |  |  |  |  |  | 0.7   | 31 | 1     | 0.91  | 49      | 0.93  | 5.2 | 41      | 2.2e-06 | 4.8 | 52      | 1e-05   |
| 160 | GO:0044248 | P | 329  | cellular catabolic process                                     |  |  |  |  |  | 2.8   | 42 | 0.11  | -1.2  | 13      | 0.93  | 5.1 | 34      | 2.5e-06 | 7.2 | 52      | 8.9e-12 |
| 161 | GO:0042026 | P | 25   | protein refolding                                              |  |  |  |  |  | 0.58  | 38 | 1     | -0.55 | 0.96    | 0.93  | 5.1 | 65      | 3.2e-06 | 4.1 | 80      | 0.00021 |
| 162 | GO:0009260 | P | 163  | ribonucleotide biosynthetic process                            |  |  |  |  |  | 1.7   | 40 | 0.64  | -0.68 | 15      | 0.93  | 5   | 39      | 4.7e-06 | 6.5 | 59      | 7.9e-10 |
| 163 | GO:0009259 | P | 163  | ribonucleotide metabolic process                               |  |  |  |  |  | 1.7   | 40 | 0.64  | -0.68 | 15      | 0.93  | 5   | 39      | 4.7e-06 | 6.5 | 59      | 7.9e-10 |
| 164 | GO:0009152 | P | 157  | purine ribonucleotide biosynthetic process                     |  |  |  |  |  | 1.7   | 40 | 0.63  | -0.69 | 15      | 0.93  | 5   | 39      | 5e-06   | 6.5 | 60      | 6.3e-10 |
| 165 | GO:0009150 | P | 157  | purine ribonucleotide metabolic process                        |  |  |  |  |  | 1.7   | 40 | 0.63  | -0.69 | 15      | 0.93  | 5   | 39      | 5e-06   | 6.5 | 60      | 6.3e-10 |
| 166 | GO:0048522 | P | 13   | positive regulation of cellular process                        |  |  |  |  |  | 1.4   | 70 | 0.86  | -0.35 | 3.8     | 0.93  | 4.9 | 79      | 6.8e-06 | 2.5 | 71      | 0.045   |
| 167 | GO:0048518 | P | 13   | positive regulation of biological process                      |  |  |  |  |  | 1.4   | 70 | 0.86  | -0.35 | 3.8     | 0.93  | 4.9 | 79      | 6.8e-06 | 2.5 | 71      | 0.045   |
| 168 | GO:0046365 | P | 125  | monosaccharide catabolic process                               |  |  |  |  |  | 1.3   | 38 | 0.98  | -0.36 | 21      | 0.93  | 4.9 | 41      | 7.6e-06 | 8.4 | 76      | 0       |
| 169 | GO:0019320 | P | 125  | hexose catabolic process                                       |  |  |  |  |  | 1.3   | 38 | 0.98  | -0.36 | 21      | 0.93  | 4.9 | 41      | 7.6e-06 | 8.4 | 76      | 0       |



|     |            |         |      |                                                                                                 |                                                        |  |  |  |       |    |      |       |         |       |     |    |         |        |         |         |
|-----|------------|---------|------|-------------------------------------------------------------------------------------------------|--------------------------------------------------------|--|--|--|-------|----|------|-------|---------|-------|-----|----|---------|--------|---------|---------|
| 230 | GO:0019752 | P       | 495  | carboxylic acid metabolic process                                                               |                                                        |  |  |  | 2.6   | 38 | 0.15 | -1    | 17      | 0.93  | 3.3 | 29 | 0.0041  | 6.5    | 45      | 6.1e-10 |
| 231 | GO:0006082 | P       | 496  | organic acid metabolic process                                                                  |                                                        |  |  |  | 2.6   | 38 | 0.15 | -1.1  | 17      | 0.93  | 3.3 | 29 | 0.0042  | 6.5    | 45      | 6e-10   |
| 232 | GO:0007242 | P       | 185  | intracellular signaling cascade                                                                 |                                                        |  |  |  | 1.2   | 34 | 1    | 0.61  | 41      | 0.93  | 3.3 | 33 | 0.0043  | 0.58   | 28      | 0.81    |
| 233 | GO:0009081 | P       | 26   | branched chain family amino acid metabolic process                                              |                                                        |  |  |  | 0.32  | 32 | 1    | -0.54 | 2       | 0.93  | 3.3 | 49 | 0.0047  | 1.6    | 47      | 0.28    |
| 234 | GO:0042180 | P       | 502  | cellular ketone metabolic process                                                               |                                                        |  |  |  | 2.5   | 37 | 0.17 | -1.1  | 17      | 0.93  | 3.2 | 29 | 0.006   | 6.4    | 44      | 1.1e-09 |
| 235 | GO:0000271 | P       | 109  | polysaccharide biosynthetic process                                                             |                                                        |  |  |  | -0.13 | 23 | 1    | -0.3  | 22      | 0.93  | 3.2 | 35 | 0.006   | 1.5    | 35      | 0.32    |
| 236 | GO:0022610 | P       | 132  | biological adhesion                                                                             |                                                        |  |  |  | 0.4   | 28 | 1    | 0.22  | 34      | 0.93  | 3.1 | 34 | 0.0068  | 0.86   | 30      | 0.7     |
| 237 | GO:0007155 | P       | 132  | cell adhesion                                                                                   |                                                        |  |  |  | 0.4   | 28 | 1    | 0.22  | 34      | 0.93  | 3.1 | 34 | 0.0068  | 0.86   | 30      | 0.7     |
| 238 | GO:0008652 | P       | 133  | cellular amino acid biosynthetic process                                                        |                                                        |  |  |  | 0.23  | 27 | 1    | 0.42  | 39      | 0.93  | 3.1 | 34 | 0.0073  | 3.1    | 43      | 0.0079  |
| 239 | GO:0051274 | P       | 11   | beta-glucan biosynthetic process                                                                |                                                        |  |  |  | 0.24  | 33 | 1    | -0.27 | 8.3     | 0.93  | 3.1 | 61 | 0.008   | 0.087  | 27      | 0.99    |
| 240 | GO:0051273 | P       | 11   | beta-glucan metabolic process                                                                   |                                                        |  |  |  | 0.24  | 33 | 1    | -0.27 | 8.3     | 0.93  | 3.1 | 61 | 0.008   | 0.087  | 27      | 0.99    |
| 241 | GO:0006075 | P       | 11   | 1,3-beta-glucan biosynthetic process                                                            |                                                        |  |  |  | 0.24  | 33 | 1    | -0.27 | 8.3     | 0.93  | 3.1 | 61 | 0.008   | 0.087  | 27      | 0.99    |
| 242 | GO:0006074 | P       | 11   | 1,3-beta-glucan metabolic process                                                               |                                                        |  |  |  | 0.24  | 33 | 1    | -0.27 | 8.3     | 0.93  | 3.1 | 61 | 0.008   | 0.087  | 27      | 0.99    |
| 243 | GO:0006520 | P       | 337  | cellular amino acid metabolic process                                                           |                                                        |  |  |  | 0.61  | 28 | 1    | -0.66 | 20      | 0.93  | 3   | 30 | 0.0092  | 4.8    | 43      | 7.4e-06 |
| 244 | GO:0006413 | P       | 45   | translational initiation                                                                        |                                                        |  |  |  | 0.97  | 41 | 1    | -0.41 | 13      | 0.93  | 3   | 41 | 0.0097  | 1.9    | 44      | 0.16    |
| 245 | GO:0006812 | P       | 397  | cation transport                                                                                |                                                        |  |  |  | 1.2   | 32 | 1    | -1.2  | 14      | 0.93  | 3   | 29 | 0.011   | 4.9    | 41      | 6.3e-06 |
| 246 | GO:0006352 | P       | 69   | transcription initiation                                                                        |                                                        |  |  |  | -0.4  | 19 | 1    | -0.79 | 4.5     | 0.93  | 3   | 37 | 0.011   | 0.56   | 29      | 0.81    |
| 247 | GO:0042254 | P       | 51   | ribosome biogenesis                                                                             |                                                        |  |  |  | 0.24  | 28 | 1    | -0.75 | 2.2     | 0.93  | 2.9 | 39 | 0.015   | 3      | 53      | 0.01    |
| 248 | GO:0022613 | P       | 51   | ribonucleoprotein complex biogenesis                                                            |                                                        |  |  |  | 0.24  | 28 | 1    | -0.75 | 2.2     | 0.93  | 2.9 | 39 | 0.015   | 3      | 53      | 0.01    |
| 249 | GO:0043632 | 0043632 | P    | 102                                                                                             | modification-dependent macromolecule catabolic process |  |  |  | 0.29  | 28 | 1    | -0.79 | 8.9     | 0.93  | 2.9 | 34 | 0.015   | -0.022 | 25      | 1       |
| 250 | GO:0019941 | P       | 102  | modification-dependent protein catabolic process                                                |                                                        |  |  |  | 0.29  | 28 | 1    | -0.79 | 8.9     | 0.93  | 2.9 | 34 | 0.015   | -0.022 | 25      | 1       |
| 251 | GO:0006511 | P       | 102  | ubiquitin-dependent protein catabolic process                                                   |                                                        |  |  |  | 0.29  | 28 | 1    | -0.79 | 8.9     | 0.93  | 2.9 | 34 | 0.015   | -0.022 | 25      | 1       |
| 252 | GO:0006108 | P       | 20   | malate metabolic process                                                                        |                                                        |  |  |  | 0.88  | 47 | 1    | -0.21 | 17      | 0.93  | 2.8 | 49 | 0.016   | 8.4    | 1.5e+02 | 0       |
| 253 | GO:0051169 | P       | 61   | nuclear transport                                                                               |                                                        |  |  |  | 0.81  | 36 | 1    | 0.073 | 32      | 0.98  | 2.8 | 38 | 0.016   | 0.97   | 33      | 0.62    |
| 254 | GO:0006913 | P       | 61   | nucleocytoplasmic transport                                                                     |                                                        |  |  |  | 0.81  | 36 | 1    | 0.073 | 32      | 0.98  | 2.8 | 38 | 0.016   | 0.97   | 33      | 0.62    |
| 255 | GO:0034637 | P       | 143  | cellular carbohydrate biosynthetic process                                                      |                                                        |  |  |  | -0.14 | 23 | 1    | -0.4  | 21      | 0.93  | 2.8 | 32 | 0.017   | 1.6    | 34      | 0.28    |
| 256 | GO:0016051 | P       | 148  | carbohydrate biosynthetic process                                                               |                                                        |  |  |  | -0.17 | 23 | 1    | -0.44 | 20      | 0.93  | 2.8 | 32 | 0.019   | 1.5    | 33      | 0.33    |
| 257 | GO:0043648 | 0043648 | P    | 56                                                                                              | dicarboxylic acid metabolic process                    |  |  |  | 0.41  | 31 | 1    | -0.5  | 12      | 0.93  | 2.8 | 38 | 0.019   | 5.3    | 73      | 7.3e-07 |
| 258 | GO:0046483 | P       | 347  | heterocycle metabolic process                                                                   |                                                        |  |  |  | 0.43  | 27 | 1    | -0.69 | 20      | 0.93  | 2.7 | 29 | 0.022   | 6      | 47      | 1.3e-08 |
| 259 | GO:0006811 | P       | 483  | ion transport                                                                                   |                                                        |  |  |  | 1.1   | 30 | 1    | -1    | 17      | 0.93  | 2.6 | 28 | 0.028   | 4.3    | 38      | 8.9e-05 |
| 260 | GO:0009086 | P       | 10   | methionine biosynthetic process                                                                 |                                                        |  |  |  | 0.67  | 49 | 1    | -0.31 | 3.7     | 0.93  | 2.5 | 55 | 0.04    | 2.5    | 79      | 0.041   |
| 261 | GO:0006807 | P       | 2524 | nitrogen compound metabolic process                                                             |                                                        |  |  |  | 0.46  | 26 | 1    | -3.3  | 12      | 0.026 | 2.5 | 25 | 0.044   | -0.077 | 25      | 0.99    |
| 262 | GO:0043094 | 0043094 | P    | 17                                                                                              | cellular metabolic compound salvage                    |  |  |  | 0.25  | 32 | 1    | -0.34 | 7.9     | 0.93  | 2.4 | 47 | 0.047   | 1.4    | 48      | 0.37    |
| 263 | GO:0006396 | P       | 188  | RNA processing                                                                                  |                                                        |  |  |  | -0.23 | 23 | 1    | -1.4  | 3.2     | 0.93  | 2.4 | 30 | 0.049   | 0.27   | 26      | 0.96    |
| 264 | GO:0003735 | F       | 484  | structural constituent of ribosome                                                              |                                                        |  |  |  | 2     | 35 | 0.57 | -1.8  | 8.5     | 0.86  | 14  | 48 | 0       | 23     | 94      | 0       |
| 265 | GO:0003924 | F       | 154  | GTPase activity                                                                                 |                                                        |  |  |  | 3     | 52 | 0.14 | 1.8   | 67      | 0.85  | 11  | 60 | 0       | 7      | 63      | 4.7e-11 |
| 266 | GO:0003676 | F       | 2585 | nucleic acid binding                                                                            |                                                        |  |  |  | 0.13  | 25 | 1    | -3.3  | 13      | 0.035 | 11  | 31 | 0       | 1.7    | 27      | 0.33    |
| 267 | GO:0008135 | F       | 87   | translation factor activity, nucleic acid binding                                               |                                                        |  |  |  | 2.8   | 59 | 0.19 | -0.61 | 12      | 0.93  | 9.9 | 66 | 0       | 8.7    | 88      | 0       |
| 268 | GO:0032561 | F       | 289  | guanyl ribonucleotide binding                                                                   |                                                        |  |  |  | 2.4   | 41 | 0.33 | 1.5   | 52      | 0.93  | 9.1 | 45 | 0       | 5.6    | 47      | 4.4e-07 |
| 269 | GO:0005525 | F       | 289  | GTP binding                                                                                     |                                                        |  |  |  | 2.4   | 41 | 0.33 | 1.5   | 52      | 0.93  | 9.1 | 45 | 0       | 5.6    | 47      | 4.4e-07 |
| 270 | GO:0019001 | F       | 299  | guanyl nucleotide binding                                                                       |                                                        |  |  |  | 2.3   | 40 | 0.36 | 1.4   | 51      | 0.93  | 9   | 44 | 0       | 5.4    | 46      | 1e-06   |
| 271 | GO:0003723 | F       | 404  | RNA binding                                                                                     |                                                        |  |  |  | 1.2   | 31 | 1    | -2    | 3.4     | 0.64  | 8   | 39 | 7.7e-14 | 7      | 49      | 4.8e-11 |
| 272 | GO:0051082 | F       | 150  | unfolded protein binding                                                                        |                                                        |  |  |  | 2.3   | 46 | 0.34 | -1.1  | 5.9     | 0.93  | 7.2 | 47 | 2.4e-11 | 4.5    | 50      | 9.4e-05 |
| 273 | GO:0016462 | F       | 886  | pyrophosphatase activity                                                                        |                                                        |  |  |  | 1.1   | 29 | 1    | -1    | 20      | 0.93  | 7.2 | 33 | 3e-11   | 3.5    | 33      | 0.0042  |
| 274 | GO:0016817 | F       | 908  | hydrolase activity, acting on acid anhydrides                                                   |                                                        |  |  |  | 1     | 28 | 1    | -1.1  | 20      | 0.93  | 7.1 | 32 | 5.8e-11 | 3.4    | 32      | 0.0066  |
| 275 | GO:0005488 | F       | 8563 | binding                                                                                         |                                                        |  |  |  | 1.3   | 26 | 1    | 0.57  | 31      | 0.93  | 7   | 26 | 7.2e-11 | 2.2    | 27      | 0.12    |
| 276 | GO:0016818 | F       | 903  | hydrolase activity, acting on acid anhydrides, in phosphorus-containing anhydrides              |                                                        |  |  |  | 0.98  | 28 | 1    | -1.1  | 20      | 0.93  | 7   | 32 | 8e-11   | 3.3    | 32      | 0.0076  |
| 277 | GO:0019843 | F       | 20   | rRNA binding                                                                                    |                                                        |  |  |  | 1     | 51 | 1    | -0.47 | 2.1     | 0.93  | 7   | 87 | 1.1e-10 | 9.2    | 1.6e+02 | 0       |
| 278 | GO:0046961 | F       | 29   | proton-transporting ATPase activity, rotational mechanism                                       |                                                        |  |  |  | 2.2   | 72 | 0.38 | -0.18 | 21      | 0.93  | 6.6 | 74 | 9.6e-10 | 7.5    | 1.2e+02 | 2.2e-12 |
| 279 | GO:0017111 | F       | 856  | nucleoside-triphosphatase activity                                                              |                                                        |  |  |  | 0.91  | 28 | 1    | -1    | 20      | 0.93  | 6.6 | 32 | 9.6e-10 | 3      | 32      | 0.016   |
| 280 | GO:0015078 | F       | 105  | hydrogen ion transmembrane transporter activity                                                 |                                                        |  |  |  | 2.6   | 53 | 0.25 | -0.41 | 19      | 0.93  | 6.5 | 49 | 1.8e-09 | 10     | 93      | 0       |
| 281 | GO:0046933 | F       | 26   | hydrogen ion transporting ATP synthase activity, rotational mechanism                           |                                                        |  |  |  | 1.9   | 66 | 0.76 | -0.19 | 20      | 0.93  | 6.2 | 73 | 1.5e-08 | 7.5    | 1.2e+02 | 1.4e-12 |
| 282 | GO:0019829 | F       | 42   | cation-transporting ATPase activity                                                             |                                                        |  |  |  | 1.7   | 54 | 0.97 | -0.35 | 15      | 0.93  | 5.8 | 59 | 2.1e-07 | 5.9    | 87      | 6.2e-08 |
| 283 | GO:0015077 | F       | 128  | monovalent inorganic cation transmembrane transporter activity                                  |                                                        |  |  |  | 2.2   | 47 | 0.38 | -0.55 | 17      | 0.93  | 5.6 | 43 | 4.1e-07 | 9.1    | 79      | 0       |
| 284 | GO:0016620 | F       | 23   | oxidoreductase activity, acting on the aldehyde or oxo group of donors, NAD or NADP as acceptor |                                                        |  |  |  | 1.7   | 66 | 0.93 | -0.22 | 17      | 0.93  | 5.2 | 68 | 3.9e-06 | 11     | 1.7e+02 | 0       |
| 285 | GO:0051287 | F       | 55   | NAD or NADH binding                                                                             |                                                        |  |  |  | 1.7   | 51 | 0.97 | 1.9   | 97      | 0.69  | 5   | 50 | 1.4e-05 | 11     | 1.2e+02 | 0       |
| 286 | GO:0016903 | F       | 32   | oxidoreductase activity, acting on the aldehyde or oxo group of donors                          |                                                        |  |  |  | 1.6   | 57 | 1    | -0.27 | 17      | 0.93  | 4.8 | 58 | 2.9e-05 | 9.5    | 1.4e+02 | 0       |
| 287 | GO:0003677 | F       | 1585 | DNA binding                                                                                     |                                                        |  |  |  | -1.5  | 20 | 1    | -2.3  | 14      | 0.41  | 4.8 | 28 | 3.4e-05 | -2.8   | 20      | 0.033   |
| 288 | GO:0019904 | F       | 12   | protein domain specific binding                                                                 |                                                        |  |  |  | 1.9   | 86 | 0.76 | 2.1   | 1.9e+02 | 0.48  | 4.8 | 79 | 3.4e-05 | 2.4    | 71      | 0.088   |
| 289 | GO:0022890 | F       | 174  | inorganic cation transmembrane transporter activity                                             |                                                        |  |  |  | 1.7   | 39 | 0.97 | -0.82 | 13      | 0.93  | 4.7 | 37 | 4.8e-05 | 7.4    | 63      | 4.5e-12 |

|     |            |         |      |                                                                                                |                                                    |  |  |  |  |        |    |       |        |         |       |     |    |         |       |         |         |
|-----|------------|---------|------|------------------------------------------------------------------------------------------------|----------------------------------------------------|--|--|--|--|--------|----|-------|--------|---------|-------|-----|----|---------|-------|---------|---------|
| 290 | GO:0035251 | F       | 56   | UDP-glucosyltransferase activity                                                               |                                                    |  |  |  |  | 0.31   | 29 | 1     | -0.6   | 8.5     | 0.93  | 4.5 | 47 | 0.00011 | 5.1   | 71      | 4.4e-06 |
| 291 | GO:0000166 | F       | 2664 | nucleotide binding                                                                             |                                                    |  |  |  |  | -0.099 | 24 | 1     | 0.52   | 32      | 0.93  | 4.4 | 26 | 0.00017 | 2.3   | 28      | 0.1     |
| 292 | GO:0046527 | F       | 68   | glucosyltransferase activity                                                                   |                                                    |  |  |  |  | 0.079  | 26 | 1     | -0.7   | 7.3     | 0.93  | 4.4 | 45 | 0.00018 | 4.7   | 63      | 4e-05   |
| 293 | GO:0032555 | F       | 2410 | purine ribonucleotide binding                                                                  |                                                    |  |  |  |  | -0.31  | 24 | 1     | 0.64   | 33      | 0.93  | 4.3 | 26 | 0.00021 | 0.73  | 26      | 0.77    |
| 294 | GO:0032553 | F       | 2410 | ribonucleotide binding                                                                         |                                                    |  |  |  |  | -0.31  | 24 | 1     | 0.64   | 33      | 0.93  | 4.3 | 26 | 0.00021 | 0.73  | 26      | 0.77    |
| 295 | GO:0004634 | F       | 12   | phosphopyruvate hydratase activity                                                             |                                                    |  |  |  |  | 0.92   | 55 | 1     | 0.22   | 46      | 0.93  | 4.2 | 73 | 0.00033 | 2.9   | 82      | 0.021   |
| 296 | GO:0070003 | F       | 29   | threonine-type peptidase activity                                                              |                                                    |  |  |  |  | 1.3    | 52 | 1     | -0.53  | 3.9     | 0.93  | 4.1 | 54 | 0.00043 | 1.9   | 49      | 0.24    |
| 297 | GO:0004298 | F       | 29   | threonine-type endopeptidase activity                                                          |                                                    |  |  |  |  | 1.3    | 52 | 1     | -0.53  | 3.9     | 0.93  | 4.1 | 54 | 0.00043 | 1.9   | 49      | 0.24    |
| 298 | GO:0017076 | F       | 2530 | purine nucleotide binding                                                                      |                                                    |  |  |  |  | -0.35  | 24 | 1     | 0.4    | 31      | 0.93  | 3.9 | 26 | 0.0012  | 0.82  | 26      | 0.75    |
| 299 | GO:0042625 | F       | 98   | ATPase activity, coupled to transmembrane movement of ions                                     |                                                    |  |  |  |  | 1.1    | 37 | 1     | -0.39  | 19      | 0.93  | 3.8 | 39 | 0.0016  | 3.5   | 49      | 0.0039  |
| 300 | GO:0004427 | F       | 28   | inorganic diphosphatase activity                                                               |                                                    |  |  |  |  | 1      | 46 | 1     | 0.014  | 30      | 1     | 3.6 | 51 | 0.0037  | 2.8   | 60      | 0.033   |
| 301 | GO:0016859 | F       | 27   | cis-trans isomerase activity                                                                   |                                                    |  |  |  |  | 0.76   | 41 | 1     | 1.9    | 1.3e+02 | 0.68  | 3.5 | 50 | 0.0052  | 3.2   | 66      | 0.012   |
| 302 | GO:0003755 | F       | 27   | peptidyl-prolyl cis-trans isomerase activity                                                   |                                                    |  |  |  |  | 0.76   | 41 | 1     | 1.9    | 1.3e+02 | 0.68  | 3.5 | 50 | 0.0052  | 3.2   | 66      | 0.012   |
| 303 | GO:0016831 | F       | 48   | carboxy-lyase activity                                                                         |                                                    |  |  |  |  | 0.79   | 38 | 1     | 0.48   | 47      | 0.93  | 3.4 | 43 | 0.0056  | 10    | 1.2e+02 | 0       |
| 304 | GO:0015405 | F       | 168  | P-P-bond-hydrolysis-driven transmembrane transporter activity                                  |                                                    |  |  |  |  | 0.84   | 32 | 1     | -0.7   | 15      | 0.93  | 3.4 | 34 | 0.006   | 3.2   | 42      | 0.0099  |
| 305 | GO:0015399 | F       | 168  | primary active transmembrane transporter activity                                              |                                                    |  |  |  |  | 0.84   | 32 | 1     | -0.7   | 15      | 0.93  | 3.4 | 34 | 0.006   | 3.2   | 42      | 0.0099  |
| 306 | GO:0016986 | F       | 29   | transcription initiation factor activity                                                       |                                                    |  |  |  |  | -0.44  | 15 | 1     | -0.56  | 2.4     | 0.93  | 3.3 | 48 | 0.0071  | 1.6   | 45      | 0.41    |
| 307 | GO:0016830 | F       | 85   | carbon-carbon lyase activity                                                                   |                                                    |  |  |  |  | 0.61   | 32 | 1     | 0.32   | 38      | 0.93  | 3.3 | 38 | 0.0076  | 10    | 1e+02   | 0       |
| 308 | GO:0004576 | F       | 10   | oligosaccharyl transferase activity                                                            |                                                    |  |  |  |  | 0.46   | 41 | 1     | -0.34  | 1.3     | 0.93  | 3.2 | 65 | 0.011   | 0.8   | 42      | 0.75    |
| 309 | GO:0003743 | F       | 47   | translation initiation factor activity                                                         |                                                    |  |  |  |  | 0.97   | 41 | 1     | -0.44  | 13      | 0.93  | 3.2 | 42 | 0.011   | 2     | 45      | 0.2     |
| 310 | GO:0003843 | F       | 11   | 1,3-beta-glucan synthase activity                                                              |                                                    |  |  |  |  | 0.24   | 33 | 1     | -0.27  | 8.3     | 0.93  | 3.1 | 61 | 0.016   | 0.087 | 27      | 0.96    |
| 311 | GO:0000287 | F       | 111  | magnesium ion binding                                                                          |                                                    |  |  |  |  | 1.2    | 37 | 1     | -0.59  | 15      | 0.93  | 3.1 | 35 | 0.017   | 2.4   | 40      | 0.095   |
| 312 | GO:0008194 | F       | 86   | UDP-glycosyltransferase activity                                                               |                                                    |  |  |  |  | 0.17   | 27 | 1     | -0.52  | 15      | 0.93  | 3.1 | 36 | 0.017   | 3.6   | 51      | 0.0035  |
| 313 | GO:0016820 | F       | 138  | hydrolase activity, acting on acid anhydrides, catalyzing transmembrane movement of substances |                                                    |  |  |  |  | 0.78   | 32 | 1     | -0.7   | 14      | 0.93  | 3   | 33 | 0.018   | 2.8   | 41      | 0.027   |
| 314 | GO:0008483 | F       | 28   | transaminase activity                                                                          |                                                    |  |  |  |  | 0.62   | 38 | 1     | -0.5   | 4.7     | 0.93  | 2.9 | 45 | 0.029   | 2.1   | 51      | 0.18    |
| 315 | GO:0043492 | 0043492 | F    | 133                                                                                            | ATPase activity, coupled to movement of substances |  |  |  |  | 0.74   | 32 | 1     | -0.67  | 14      | 0.93  | 2.9 | 33 | 0.029   | 2.7   | 41      | 0.035   |
| 316 | GO:0042626 | F       | 133  | ATPase activity, coupled to transmembrane movement of substances                               |                                                    |  |  |  |  | 0.74   | 32 | 1     | -0.67  | 14      | 0.93  | 2.9 | 33 | 0.029   | 2.7   | 41      | 0.035   |
| 317 | GO:0016615 | F       | 20   | malate dehydrogenase activity                                                                  |                                                    |  |  |  |  | 0.88   | 47 | 1     | -0.21  | 17      | 0.93  | 2.8 | 49 | 0.03    | 8.4   | 1.5e+02 | 0       |
| 318 | GO:0016832 | F       | 10   | aldehyde-lyase activity                                                                        |                                                    |  |  |  |  | 0.96   | 59 | 1     | 0.79   | 94      | 0.93  | 2.8 | 60 | 0.03    | 8.8   | 2.1e+02 | 0       |
| 319 | GO:0016853 | F       | 234  | isomerase activity                                                                             |                                                    |  |  |  |  | 1.7    | 37 | 0.97  | -0.22  | 26      | 0.93  | 2.8 | 30 | 0.033   | 3.8   | 42      | 0.0014  |
| 320 | GO:0042623 | F       | 270  | ATPase activity, coupled                                                                       |                                                    |  |  |  |  | 0.53   | 28 | 1     | -1.3   | 8       | 0.93  | 2.8 | 30 | 0.035   | 1.6   | 31      | 0.41    |
| 321 | GO:0032991 | C       | 1357 | macromolecular complex                                                                         |                                                    |  |  |  |  | 2.8    | 33 | 0.12  | -1.2   | 21      | 0.87  | 20  | 45 | 0       | 23    | 67      | 0       |
| 322 | GO:0043232 | 0043232 | C    | 936                                                                                            | intracellular non-membrane-bounded organelle       |  |  |  |  | 2.2    | 33 | 0.39  | 1.7    | 44      | 0.61  | 19  | 49 | 0       | 20    | 69      | 0       |
| 323 | GO:0043228 | 0043228 | C    | 936                                                                                            | non-membrane-bounded organelle                     |  |  |  |  | 2.2    | 33 | 0.39  | 1.7    | 44      | 0.61  | 19  | 49 | 0       | 20    | 69      | 0       |
| 324 | GO:0032993 | C       | 123  | protein-DNA complex                                                                            |                                                    |  |  |  |  | 1.3    | 38 | 1     | 0.47   | 40      | 0.87  | 19  | 93 | 0       | 8.4   | 76      | 0       |
| 325 | GO:0000786 | C       | 123  | nucleosome                                                                                     |                                                    |  |  |  |  | 1.3    | 38 | 1     | 0.47   | 40      | 0.87  | 19  | 93 | 0       | 8.4   | 76      | 0       |
| 326 | GO:0044424 | C       | 3090 | intracellular part                                                                             |                                                    |  |  |  |  | 2.4    | 30 | 0.29  | -1     | 24      | 0.87  | 17  | 35 | 0       | 16    | 44      | 0       |
| 327 | GO:0000785 | C       | 169  | chromatin                                                                                      |                                                    |  |  |  |  | 0.85   | 32 | 1     | 0.096  | 31      | 0.94  | 16  | 75 | 0       | 7.3   | 63      | 1.6e-12 |
| 328 | GO:0044427 | C       | 181  | chromosomal part                                                                               |                                                    |  |  |  |  | 0.72   | 31 | 1     | -0.002 | 29      | 1     | 16  | 72 | 0       | 6.9   | 60      | 2.3e-11 |
| 329 | GO:0005622 | C       | 3688 | intracellular                                                                                  |                                                    |  |  |  |  | 2      | 28 | 0.46  | -0.85  | 26      | 0.87  | 16  | 33 | 0       | 14    | 40      | 0       |
| 330 | GO:0005694 | C       | 233  | chromosome                                                                                     |                                                    |  |  |  |  | 0.5    | 28 | 1     | -0.33  | 24      | 0.87  | 15  | 64 | 0       | 7.2   | 57      | 4.3e-12 |
| 331 | GO:0043229 | 0043229 | C    | 2373                                                                                           | intracellular organelle                            |  |  |  |  | 1.9    | 29 | 0.46  | -0.67  | 26      | 0.87  | 15  | 36 | 0       | 13    | 43      | 0       |
| 332 | GO:0043226 | 0043226 | C    | 2373                                                                                           | organelle                                          |  |  |  |  | 1.9    | 29 | 0.46  | -0.67  | 26      | 0.87  | 15  | 36 | 0       | 13    | 43      | 0       |
| 333 | GO:0044446 | C       | 682  | intracellular organelle part                                                                   |                                                    |  |  |  |  | 1.4    | 31 | 1     | -0.46  | 25      | 0.87  | 15  | 46 | 0       | 12    | 56      | 0       |
| 334 | GO:0044422 | C       | 682  | organelle part                                                                                 |                                                    |  |  |  |  | 1.4    | 31 | 1     | -0.46  | 25      | 0.87  | 15  | 46 | 0       | 12    | 56      | 0       |
| 335 | GO:0005840 | C       | 489  | ribosome                                                                                       |                                                    |  |  |  |  | 2.1    | 35 | 0.39  | -1.8   | 8.5     | 0.59  | 14  | 48 | 0       | 23    | 94      | 0       |
| 336 | GO:0030529 | C       | 534  | ribonucleoprotein complex                                                                      |                                                    |  |  |  |  | 2.1    | 35 | 0.39  | -1.9   | 8.5     | 0.57  | 14  | 47 | 0       | 22    | 88      | 0       |
| 337 | GO:0044444 | C       | 1059 | cytoplasmic part                                                                               |                                                    |  |  |  |  | 3      | 35 | 0.087 | -2.2   | 11      | 0.26  | 13  | 40 | 0       | 18    | 63      | 0       |
| 338 | GO:0044464 | C       | 5557 | cell part                                                                                      |                                                    |  |  |  |  | 1.7    | 27 | 0.67  | -0.092 | 29      | 0.94  | 11  | 29 | 0       | 9.6   | 34      | 0       |
| 339 | GO:0005623 | C       | 5557 | cell                                                                                           |                                                    |  |  |  |  | 1.7    | 27 | 0.67  | -0.092 | 29      | 0.94  | 11  | 29 | 0       | 9.6   | 34      | 0       |
| 340 | GO:0015630 | C       | 65   | microtubule cytoskeleton                                                                       |                                                    |  |  |  |  | 2.4    | 59 | 0.29  | 2.9    | 1.2e+02 | 0.076 | 9   | 69 | 0       | 4.3   | 61      | 5.9e-05 |
| 341 | GO:0043234 | 0043234 | C    | 718                                                                                            | protein complex                                    |  |  |  |  | 1.6    | 31 | 0.74  | -0.34  | 26      | 0.87  | 8.6 | 36 | 0       | 10    | 50      | 0       |
| 342 | GO:0043231 | 0043231 | C    | 1596                                                                                           | intracellular membrane-bounded organelle           |  |  |  |  | 0.82   | 27 | 1     | -2.1   | 16      | 0.35  | 8.1 | 31 | 4.9e-15 | 0.066 | 25      | 0.97    |
| 343 | GO:0043227 | 0043227 | C    | 1610                                                                                           | membrane-bounded organelle                         |  |  |  |  | 0.79   | 27 | 1     | -2.1   | 16      | 0.34  | 8   | 31 | 1.3e-14 | 1.1   | 27      | 0.57    |
| 344 | GO:0044430 | C       | 83   | cytoskeletal part                                                                              |                                                    |  |  |  |  | 2      | 49 | 0.46  | 2.3    | 96      | 0.26  | 7.8 | 58 | 3.5e-14 | 3.4   | 50      | 0.0022  |
| 345 | GO:0016469 | C       | 67   | proton-transporting two-sector ATPase complex                                                  |                                                    |  |  |  |  | 2.9    | 66 | 0.087 | -0.49  | 14      | 0.87  | 7.5 | 60 | 6.1e-13 | 10    | 1.1e+02 | 0       |
| 346 | GO:0033178 | C       | 36   | proton-transporting two-sector ATPase complex, catalytic domain                                |                                                    |  |  |  |  | 2.1    | 65 | 0.39  | -0.24  | 19      | 0.89  | 6.7 | 69 | 9.9e-11 | 7.9   | 1.1e+02 | 2.2e-14 |
| 347 | GO:0005634 | C       | 1190 | nucleus                                                                                        |                                                    |  |  |  |  | -0.49  | 23 | 1     | -1.6   | 17      | 0.79  | 6.6 | 31 | 2.2e-10 | -2.2  | 21      | 0.078   |
| 348 | GO:0033279 | C       | 67   | ribosomal subunit                                                                              |                                                    |  |  |  |  | 1      | 39 | 1     | -0.75  | 5.5     | 0.87  | 5.9 | 52 | 2.3e-08 | 9.4   | 1e+02   | 0       |
| 349 | GO:0033180 | C       | 11   | proton-transporting V-type ATPase, V1 domain                                                   |                                                    |  |  |  |  | 1.8    | 88 | 0.54  | -0.26  | 9.2     | 0.89  | 5.5 | 91 | 2.4e-07 | 4.1   | 1.1e+02 | 0.00019 |

|     |            |   |     |                                                                           |  |  |  |       |    |       |        |      |      |       |     |         |       |         |         |
|-----|------------|---|-----|---------------------------------------------------------------------------|--|--|--|-------|----|-------|--------|------|------|-------|-----|---------|-------|---------|---------|
| 350 | GO:0033176 | C | 29  | proton-transporting V-type ATPase complex                                 |  |  |  | 2.1   | 70 | 0.39  | -0.41  | 9.3  | 0.87 | 5.4   | 64  | 3.2e-07 | 4.1   | 77      | 0.00014 |
| 351 | GO:0015935 | C | 39  | small ribosomal subunit                                                   |  |  |  | 1.2   | 46 | 1     | -0.54  | 6.9  | 0.87 | 5     | 56  | 3.1e-06 | 7.7   | 1.1e+02 | 1.1e-13 |
| 352 | GO:0000502 | C | 35  | proteasome complex                                                        |  |  |  | 1.4   | 52 | 1     | -0.59  | 3.4  | 0.87 | 4.8   | 56  | 8.7e-06 | 2.1   | 49      | 0.11    |
| 353 | GO:0045259 | C | 29  | proton-transporting ATP synthase complex                                  |  |  |  | 1.5   | 57 | 0.88  | -0.26  | 17   | 0.89 | 4.3   | 56  | 9.2e-05 | 10    | 1.5e+02 | 0       |
| 354 | GO:0000015 | C | 12  | phosphopyruvate hydratase complex                                         |  |  |  | 0.92  | 55 | 1     | 0.22   | 46   | 0.89 | 4.2   | 73  | 0.00013 | 2.9   | 82      | 0.012   |
| 355 | GO:0005839 | C | 29  | proteasome core complex                                                   |  |  |  | 1.3   | 52 | 1     | -0.53  | 3.9  | 0.87 | 4.1   | 54  | 0.00017 | 1.9   | 49      | 0.16    |
| 356 | GO:0045261 | C | 19  | proton-transporting ATP synthase complex, catalytic core F(1)             |  |  |  | 0.94  | 49 | 1     | -0.1   | 23   | 0.94 | 3.8   | 59  | 0.00064 | 6.3   | 1.2e+02 | 1.5e-09 |
| 357 | GO:0005783 | C | 112 | endoplasmic reticulum                                                     |  |  |  | 3.2   | 59 | 0.058 | -0.83  | 9    | 0.87 | 3.8   | 37  | 0.00071 | 1.4   | 34      | 0.39    |
| 358 | GO:0033177 | C | 29  | proton-transporting two-sector ATPase complex, proton-transporting domain |  |  |  | 2     | 67 | 0.46  | -0.44  | 8.3  | 0.87 | 3.7   | 51  | 0.00092 | 6.9   | 1.1e+02 | 2.1e-11 |
| 359 | GO:0044455 | C | 17  | mitochondrial membrane part                                               |  |  |  | 1.2   | 57 | 1     | -0.025 | 28   | 0.99 | 3.4   | 57  | 0.003   | 3.3   | 80      | 0.0031  |
| 360 | GO:0005794 | C | 55  | Golgi apparatus                                                           |  |  |  | 0.63  | 34 | 1     | -0.63  | 7.1  | 0.87 | 3.4   | 41  | 0.0031  | 1.2   | 36      | 0.48    |
| 361 | GO:0046930 | C | 11  | pore complex                                                              |  |  |  | 0.56  | 44 | 1     | -0.34  | 2.6  | 0.87 | 3.4   | 65  | 0.0031  | 1     | 45      | 0.64    |
| 362 | GO:0005643 | C | 11  | nuclear pore                                                              |  |  |  | 0.56  | 44 | 1     | -0.34  | 2.6  | 0.87 | 3.4   | 65  | 0.0031  | 1     | 45      | 0.64    |
| 363 | GO:0015934 | C | 28  | large ribosomal subunit                                                   |  |  |  | 0.19  | 29 | 1     | -0.53  | 3.4  | 0.87 | 3.2   | 48  | 0.0052  | 5.5   | 95      | 2.1e-07 |
| 364 | GO:0005635 | C | 12  | nuclear envelope                                                          |  |  |  | 0.53  | 42 | 1     | -0.35  | 2.9  | 0.87 | 3.2   | 60  | 0.0061  | 0.91  | 43      | 0.7     |
| 365 | GO:0048475 | C | 56  | coated membrane                                                           |  |  |  | 0.51  | 32 | 1     | -0.69  | 5.3  | 0.87 | 3.1   | 40  | 0.0063  | 0.93  | 33      | 0.69    |
| 366 | GO:0030117 | C | 56  | membrane coat                                                             |  |  |  | 0.51  | 32 | 1     | -0.69  | 5.3  | 0.87 | 3.1   | 40  | 0.0063  | 0.93  | 33      | 0.69    |
| 367 | GO:0000148 | C | 11  | 1,3-beta-glucan synthase complex                                          |  |  |  | 0.24  | 33 | 1     | -0.27  | 8.3  | 0.89 | 3.1   | 61  | 0.0072  | 0.087 | 27      | 0.97    |
| 368 | GO:0044459 | C | 58  | plasma membrane part                                                      |  |  |  | 1.1   | 41 | 1     | 0.9    | 60   | 0.87 | 3     | 39  | 0.0085  | 0.87  | 33      | 0.73    |
| 369 | GO:0044445 | C | 59  | cytosolic part                                                            |  |  |  | 0.36  | 30 | 1     | -0.49  | 13   | 0.87 | 3     | 39  | 0.0092  | 2.3   | 45      | 0.076   |
| 370 | GO:0005829 | C | 59  | cytosol                                                                   |  |  |  | 0.36  | 30 | 1     | -0.49  | 13   | 0.87 | 3     | 39  | 0.0092  | 2.3   | 45      | 0.076   |
| 371 | GO:0031967 | C | 148 | organelle envelope                                                        |  |  |  | 0.27  | 27 | 1     | -0.54  | 18   | 0.87 | 3     | 33  | 0.0099  | 2.5   | 39      | 0.038   |
| 372 | GO:0005886 | C | 68  | plasma membrane                                                           |  |  |  | 0.95  | 38 | 1     | 0.73   | 52   | 0.87 | 3     | 38  | 0.01    | 1.5   | 37      | 0.37    |
| 373 | GO:0031988 | C | 37  | membrane-bounded vesicle                                                  |  |  |  | 0.33  | 31 | 1     | -0.57  | 4.8  | 0.87 | 2.8   | 42  | 0.016   | 0.62  | 32      | 0.74    |
| 374 | GO:0016023 | C | 37  | cytoplasmic membrane-bounded vesicle                                      |  |  |  | 0.33  | 31 | 1     | -0.57  | 4.8  | 0.87 | 2.8   | 42  | 0.016   | 0.62  | 32      | 0.74    |
| 375 | GO:0033179 | C | 16  | proton-transporting V-type ATPase, VO domain                              |  |  |  | 1.2   | 60 | 1     | -0.3   | 10   | 0.88 | 2.6   | 50  | 0.026   | 2     | 59      | 0.13    |
| 376 | GO:0019773 | C | 12  | proteasome core complex, alpha-subunit complex                            |  |  |  | 1     | 58 | 1     | -0.37  | 1.7  | 0.87 | 2.6   | 54  | 0.028   | 1.3   | 49      | 0.47    |
| 377 | GO:0044429 | C | 146 | mitochondrial part                                                        |  |  |  | 0.2   | 26 | 1     | -0.53  | 18   | 0.87 | 2.5   | 31  | 0.034   | 2.5   | 39      | 0.042   |
| 378 | GO:0030118 | C | 21  | clathrin coat                                                             |  |  |  | 0.44  | 36 | 1     | -0.45  | 4    | 0.87 | 2.5   | 45  | 0.037   | 0.84  | 37      | 0.74    |
| 379 | GO:0012505 | C | 84  | endomembrane system                                                       |  |  |  | 0.19  | 27 | 1     | -0.86  | 5    | 0.87 | 2.5   | 34  | 0.037   | 0.072 | 25      | 0.97    |
| 380 | GO:0005798 | C | 14  | Golgi-associated vesicle                                                  |  |  |  | 0.35  | 35 | 1     | -0.29  | 9.3  | 0.88 | 2.5   | 50  | 0.037   | 1     | 43      | 0.64    |
| 381 | GO:0031975 | C | 167 | envelope                                                                  |  |  |  | 0.06  | 25 | 1     | -0.67  | 16   | 0.87 | 2.5   | 31  | 0.037   | 2.2   | 36      | 0.085   |
| 382 | GO:0031982 | C | 41  | vesicle                                                                   |  |  |  | 0.28  | 30 | 1     | -0.61  | 4.4  | 0.87 | 2.4   | 38  | 0.039   | 0.5   | 30      | 0.75    |
| 383 | GO:0031410 | C | 41  | cytoplasmic vesicle                                                       |  |  |  | 0.28  | 30 | 1     | -0.61  | 4.4  | 0.87 | 2.4   | 38  | 0.039   | 0.5   | 30      | 0.75    |
| 384 | GO:0005739 | C | 167 | mitochondrion                                                             |  |  |  | 0.088 | 25 | 1     | -0.63  | 17   | 0.87 | 2.4   | 30  | 0.041   | 2.8   | 39      | 0.019   |
| 385 | GO:0031966 | C | 120 | mitochondrial membrane                                                    |  |  |  | 0.25  | 27 | 1     | -0.34  | 21   | 0.87 | 2.4   | 32  | 0.041   | 2.5   | 40      | 0.046   |
| 386 | GO:0030135 | C | 33  | coated vesicle                                                            |  |  |  | 0.27  | 30 | 1     | -0.54  | 4.8  | 0.87 | 2.3   | 40  | 0.047   | 0.47  | 30      | 0.76    |
| 387 | GO:0015979 | P | 54  | photosynthesis                                                            |  |  |  | -0.58 | 15 | 1     | -0.81  | 0.63 | 0.93 | -3.1  | 5.3 | 0.008   | 21    | 2.2e+02 | 0       |
| 388 | GO:0071704 | P | 11  | organic substance metabolic process                                       |  |  |  | 0.025 | 25 | 1     | -0.34  | 2.8  | 0.93 | 0.038 | 23  | 0.99    | 13    | 3e+02   | 0       |
| 389 | GO:0015977 | P | 11  | carbon fixation                                                           |  |  |  | 0.025 | 25 | 1     | -0.34  | 2.8  | 0.93 | 0.038 | 23  | 0.99    | 13    | 3e+02   | 0       |
| 390 | GO:0005985 | P | 14  | sucrose metabolic process                                                 |  |  |  | 0.15  | 29 | 1     | -0.29  | 9.5  | 0.93 | 1.3   | 37  | 0.4     | 6.6   | 1.4e+02 | 3.6e-10 |
| 391 | GO:0055114 | P | 994 | oxidation reduction                                                       |  |  |  | 2.7   | 34 | 0.13  | 0.47   | 33   | 0.93 | -1.4  | 21  | 0.33    | 6.3   | 38      | 2.2e-09 |
| 392 | GO:0046356 | P | 21  | acetyl-CoA catabolic process                                              |  |  |  | 0.39  | 34 | 1     | -0.18  | 19   | 0.93 | 1.6   | 37  | 0.25    | 5.4   | 1e+02   | 3.4e-07 |
| 393 | GO:0009109 | P | 21  | coenzyme catabolic process                                                |  |  |  | 0.39  | 34 | 1     | -0.18  | 19   | 0.93 | 1.6   | 37  | 0.25    | 5.4   | 1e+02   | 3.4e-07 |
| 394 | GO:0006099 | P | 21  | tricarboxylic acid cycle                                                  |  |  |  | 0.39  | 34 | 1     | -0.18  | 19   | 0.93 | 1.6   | 37  | 0.25    | 5.4   | 1e+02   | 3.4e-07 |
| 395 | GO:0006084 | P | 21  | acetyl-CoA metabolic process                                              |  |  |  | 0.39  | 34 | 1     | -0.18  | 19   | 0.93 | 1.6   | 37  | 0.25    | 5.4   | 1e+02   | 3.4e-07 |
| 396 | GO:0015995 | P | 11  | chlorophyll biosynthetic process                                          |  |  |  | -0.36 | 12 | 1     | -0.37  | 0.44 | 0.93 | -0.86 | 12  | 0.63    | 5.3   | 1.3e+02 | 8.5e-07 |
| 397 | GO:0015994 | P | 11  | chlorophyll metabolic process                                             |  |  |  | -0.36 | 12 | 1     | -0.37  | 0.44 | 0.93 | -0.86 | 12  | 0.63    | 5.3   | 1.3e+02 | 8.5e-07 |
| 398 | GO:0051187 | P | 23  | cofactor catabolic process                                                |  |  |  | 0.35  | 33 | 1     | -0.22  | 17   | 0.93 | 1.4   | 35  | 0.34    | 5.2   | 98      | 1.1e-06 |
| 399 | GO:0009060 | P | 25  | aerobic respiration                                                       |  |  |  | 0.57  | 38 | 1     | -0.25  | 17   | 0.93 | 2.3   | 42  | 0.06    | 4.9   | 91      | 6.2e-06 |
| 400 | GO:0045333 | P | 43  | cellular respiration                                                      |  |  |  | 0.68  | 36 | 1     | -0.38  | 14   | 0.93 | 2.2   | 36  | 0.089   | 4.1   | 67      | 0.00018 |
| 401 | GO:0033014 | P | 40  | tetrapyrrole biosynthetic process                                         |  |  |  | -0.68 | 12 | 1     | -0.69  | 1.1  | 0.93 | -1.4  | 13  | 0.33    | 3.9   | 67      | 0.00038 |
| 402 | GO:0033013 | P | 42  | tetrapyrrole metabolic process                                            |  |  |  | -0.68 | 12 | 1     | -0.7   | 1    | 0.93 | -1.5  | 13  | 0.3     | 3.9   | 65      | 0.00054 |
| 403 | GO:0016137 | P | 37  | glycoside metabolic process                                               |  |  |  | -0.15 | 22 | 1     | -0.51  | 7.5  | 0.93 | 0.17  | 24  | 0.94    | 3.4   | 63      | 0.0029  |
| 404 | GO:0005984 | P | 37  | disaccharide metabolic process                                            |  |  |  | -0.15 | 22 | 1     | -0.51  | 7.5  | 0.93 | 0.17  | 24  | 0.94    | 3.4   | 63      | 0.0029  |
| 405 | GO:0051186 | P | 211 | cofactor metabolic process                                                |  |  |  | -0.17 | 23 | 1     | -1.3   | 5.5  | 0.93 | -1.4  | 19  | 0.33    | 3.3   | 40      | 0.0046  |
| 406 | GO:0009311 | P | 39  | oligosaccharide metabolic process                                         |  |  |  | -0.17 | 21 | 1     | -0.53  | 7.2  | 0.93 | 0.14  | 24  | 0.95    | 3.3   | 60      | 0.0049  |
| 407 | GO:0015980 | P | 65  | energy derivation by oxidation of organic compounds                       |  |  |  | 0.21  | 27 | 1     | 0.04   | 31   | 0.98 | 2     | 33  | 0.13    | 3.2   | 52      | 0.0053  |
| 408 | GO:0006779 | P | 32  | porphyrin biosynthetic process                                            |  |  |  | -0.6  | 12 | 1     | -0.62  | 0.96 | 0.93 | -1.3  | 13  | 0.4     | 3.2   | 63      | 0.0063  |
| 409 | GO:0000096 | P | 23  | sulfur amino acid metabolic process                                       |  |  |  | 1.1   | 52 | 1     | -0.48  | 3.2  | 0.93 | 2.1   | 41  | 0.096   | 3.2   | 70      | 0.0064  |







|     |            |   |      |          |  |  |  |       |    |   |       |     |      |       |     |       |     |    |        |
|-----|------------|---|------|----------|--|--|--|-------|----|---|-------|-----|------|-------|-----|-------|-----|----|--------|
| 469 | GO:0016020 | C | 2254 | membrane |  |  |  | 0.6   | 26 | 1 | -1.2  | 23  | 0.87 | -0.53 | 22  | 0.66  | 3.6 | 30 | 0.0014 |
| 470 | GO:0009536 | C | 33   | plastid  |  |  |  | -0.63 | 12 | 1 | -0.61 | 1.5 | 0.87 | -2    | 8.2 | 0.097 | 2.5 | 55 | 0.04   |
